# Supplementary material
Source: PubMed Central journal article supplement (PMC6446703)
Supplement: 10.1194_M092544_jlr.M092544-1.pdf [file 10.1194_M092544_jlr.M092544-1.pdf]

**SUPPLEMENTAL INFORMATION:**

**Ces1d deficiency protects against high-sucrose diet-induced hepatic triacylglycerol  
accumulation**

Jihong Lian<sup>1,2</sup>, Russell Watts<sup>1,2</sup>, Ariel D. Quiroga<sup>3</sup>, Megan R. Beggs<sup>4</sup>, R. Todd Alexander<sup>2,4</sup>, and  
Richard Lehner<sup>1,2,5</sup>

<sup>1</sup>Group on Molecular and Cell Biology of Lipids, University of Alberta, Alberta, Canada

<sup>2</sup>Department of Pediatrics, University of Alberta, Alberta, Canada

<sup>3</sup>Instituto de Fisiología Experimental (IFISE), Área Morfología, Facultad de Ciencias  
Bioquímicas y Farmacéuticas, CONICET, UNR, Rosario, Argentina.

<sup>4</sup>Department of Physiology, University of Alberta, Alberta, Canada

<sup>5</sup>Department of Cell Biology, University of Alberta, Alberta, Canada

**Supplemental Table S1. Formula of high sucrose diet (HSD)**

| <b>Formula</b>                     | <b>g/kg diet</b> |
|------------------------------------|------------------|
| Vitamin free casein                | 211              |
| Alphacel, non-nutritive bulk       | 164.50           |
| Sucrose                            | 584.50           |
| Salt mixture U.S.P. XIV            | 40               |
| Vitamin diet fortification mixture | 6                |
| Dry vitamin A acetate (500,000U/g) | 0.040            |
| Calciferol (850,000U/g)            | 0.0026           |
| Alpha tocopherol powder 250 I.U.   | 0.48             |
| Inositol                           | 0.11             |
| Choline chloride                   | 6                |
| Menadione                          | 0.049            |
| Biotin                             | 0.45             |
| P amino benzoic acid               | 0.11             |
| Ascorbic acid                      | 0.99             |
| Niacin                             | 0.098            |
| Riboflavin                         | 0.022            |
| Pyridoxine HCl                     | 0.022            |
| Thiamine HCl                       | 0.022            |
| Calcium pantothenate               | 0.066            |
| Folic acid                         | 0.0020           |
| B-12 (trituration 0.1%)            | 0.030            |

**Supplemental Table S2. Primers used for quantitative PCR analysis**

| <b>Gene</b>           | <b>Sequence</b>                     |
|-----------------------|-------------------------------------|
| <i>Acox</i>           | F: 5'- CAGCAGGAGAAATGGATGCA -3'     |
|                       | R: 5'- GGGCGTAGGTGCCAATTATCT -3'    |
| <i>Abca1</i>          | F: 5'- AGTTTCTGCCCTCTGTGGTC -3'     |
|                       | R: 5'- GGGTCGGGAGATGAGATGT -3'      |
| <i>Mlxipl (alpha)</i> | F: 5'- CGACACTCACCCACCTCTTC -3'     |
|                       | R: 5'- TTGTTCA GCCGGATCTTGTC -3'    |
| <i>Mlxipl (beta)</i>  | F: 5'- AAGACTGGGATGAACGAGCCAAGA -3' |
|                       | R: 5'- AATTTGACGTGGTTTCCACTCGCC -3' |
| <i>Cd68</i>           | F: 5'- GCGGCTCCCTGTGTGTCTGAT -3'    |
|                       | R: 5'- GGGCCTGTGGCTGGTCGTAG -3'     |
| <i>Cidea</i>          | F: 5'- GCCTGCAGGAACTTATCAGC -3'     |
|                       | R: 5'- AGAACTCCTCTGTGTCCACCA -3'    |
| <i>Cideb</i>          | F: 5'- CAGCCTCCAAGAACTGCTAGA -3'    |
|                       | R: 5'- CCTCCAGGACCAGTGTTAGC -3'     |
| <i>Cidec</i>          | F: 5'- GGGTCACAGCTTGGAGGA -3'       |
|                       | R: 5'- CTCCACGATTGTGCCATCT -3'      |
| <i>Cpt1a</i>          | F: 5'- TGAGTGGCGTCCTCTTTGG -3'      |
|                       | R: 5'- CAGCGAGTAGCGCATAGTCATG -3'   |
| <i>F4/80</i>          | F: 5'- CCCTCGGGCTGTGAGATTGTG -3'    |
|                       | R: 5'- TGGCCAAGGCAAGACATACCAG -3'   |
| <i>Fgf21</i>          | F: 5'- AGATGGAGCTCTCTATGGATCG -3'   |
|                       | R: 5'- GGGCTTCAGACTGGTACACAT -3'    |
| <i>G0s2</i>           | F: 5'- TCTCTTCCCCTGCACCCTA -3'      |
|                       | R: 5'- TCCTGCACACTTTCCATCTG -3'     |
| <i>G6p</i>            | F: 5'- GGATTCCGGTGTTTGAACGTC -3'    |
|                       | R: 5'- CGGAGGCTGGCATTGTAGATG -3'    |
| <i>Pklr</i>           | F: 5'- CATTGTGCTGACAAAGACTGG -3'    |
|                       | R: 5'- TGGGCAGAACGAGTCACA -3'       |
| <i>Ppia</i>           | F: 5'- TCCAAAGACAGCAGAAAACCTTCG -3' |
|                       | R: 5'- TCTTCTTGCTGGTCTTGCCATTCC -3' |
| <i>Nr1h3</i>          | F: 5'- CAGAAGAACAGATCCGCTTGAAG -3'  |
|                       | R: 5'- TGCAATGGGCCAAGGCGTGAC -3'    |
| <i>Pck1</i>           | F: 5'- GAACTGACAGACTCGCCCTAT -3'    |
|                       | R: 5'- TTCCCACCATATCCGCTTC -3'      |
| <i>Srebf1</i>         | F: 5'- ATGGATTGCACATTTGAAGAC -3'    |
|                       | R: 5'- CTCTCAGGAGAGTTGGCACC -3'     |
| <i>Tnfa</i>           | F: 5'- GTCTACTGAACTTCGGGGTGA -3'    |
|                       | R: 5'- CACCACTTGGTGGTTTGCTACGAC -3' |
| <i>Txnip</i>          | F: 5'- ATCCCAGATACCCAGAAGC -3'      |
|                       | R: 5'- TGAGAGTCGTCCACATCGTC -3'     |

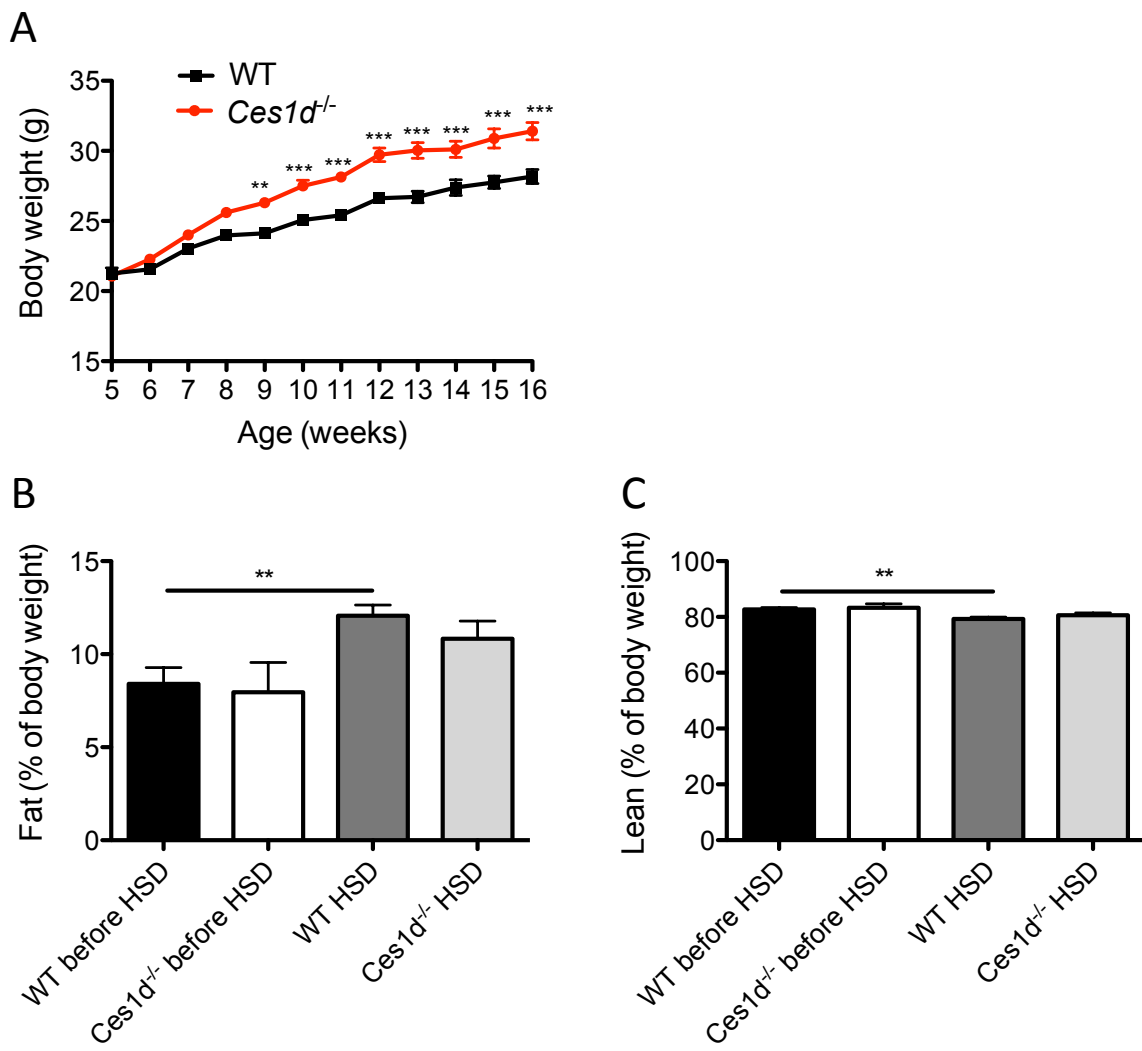

**Supplemental Figure S1.** Body weight and body composition. (A) body weight of WT and *Ces1d*<sup>-/-</sup> mice before HSD study initiation age. (B) Fat and (C) lean mass percentage of WT and *Ces1d*<sup>-/-</sup> mice before or after HSD feeding. N=5-7, values are mean ± SEM. \*\*P<0.01, \*\*\*P<0.001.

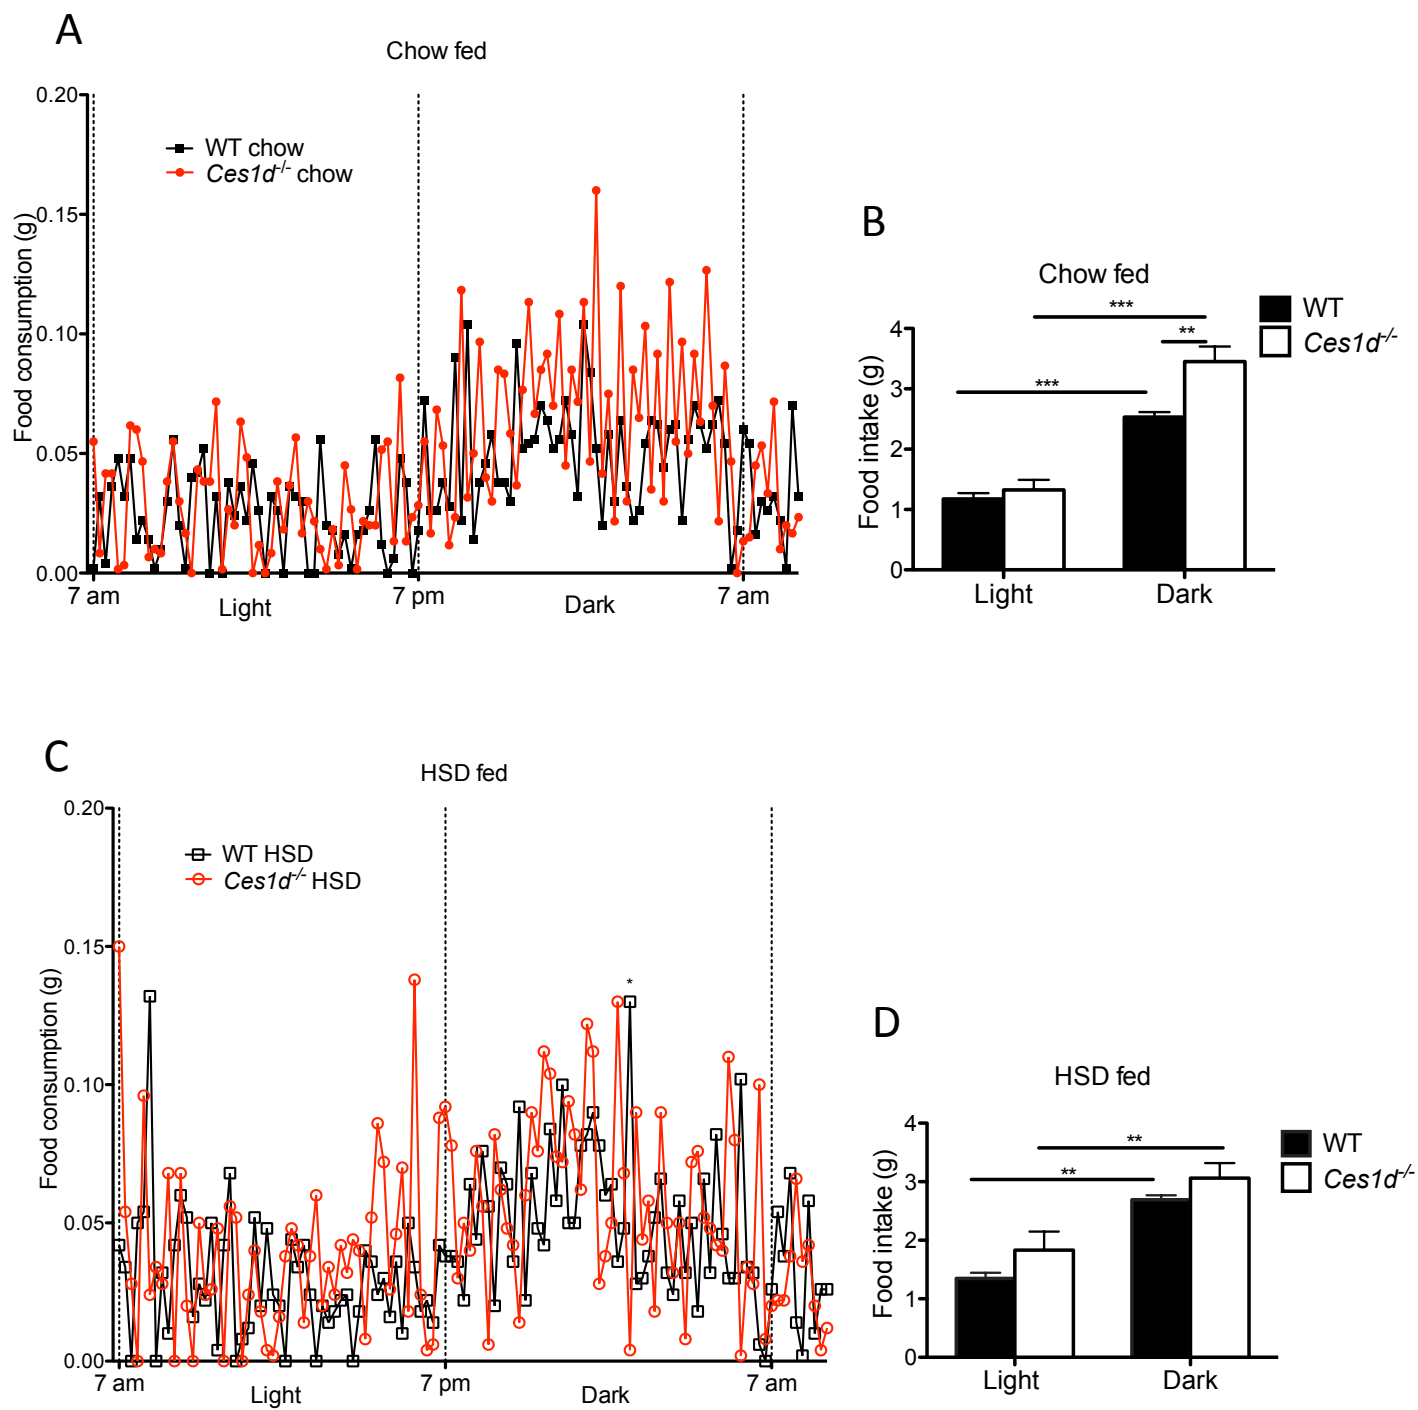

**Supplemental Figure S2.** Food intake of WT and *Ces1d<sup>-/-</sup>* mice fed either chow (A-B) or HSD (C-D) in both light and dark phases was measured by metabolic cages. N=6. values are mean  $\pm$  SEM. \*P<0.05, \*\*P<0.01, \*\*\*P<0.001.

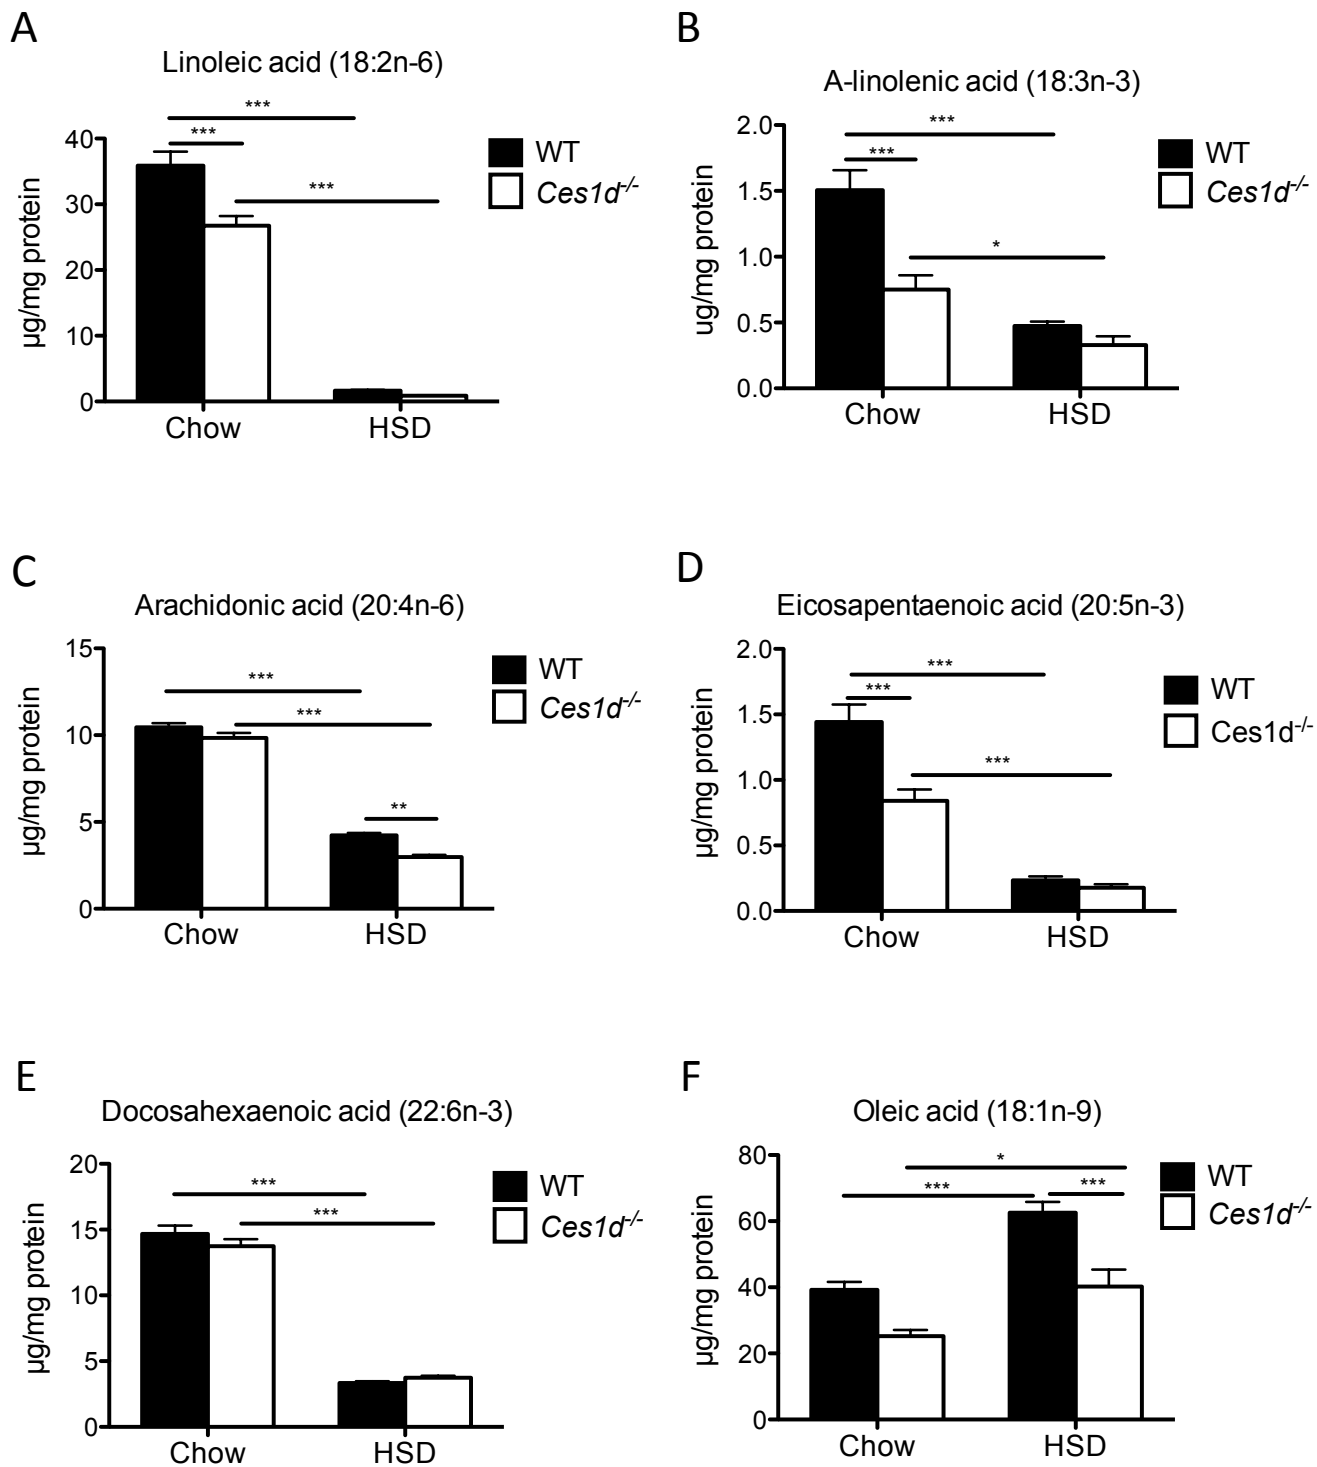

**Supplemental Figure S3.** Liver essential fatty acids (A and B) and their long-chain metabolites (C-E) in WT and *Ces1d*<sup>-/-</sup> mice fed either chow or HSD. (F) Liver oleic acid concentration in WT and *Ces1d*<sup>-/-</sup> mice fed either chow or HSD. N=6. values are mean ± SEM. \*P<0.05, \*\*P<0.01, \*\*\*P<0.001.

**A**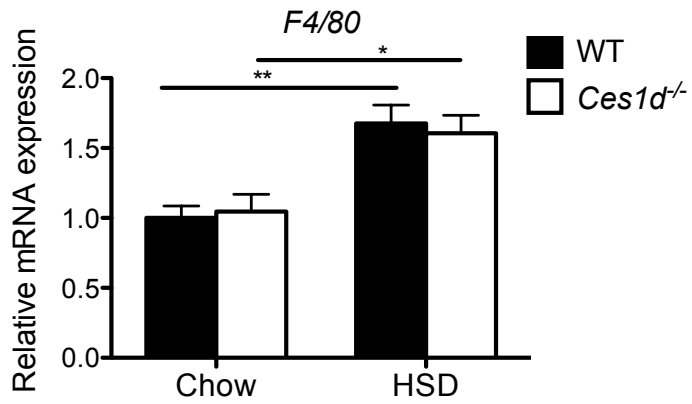**B**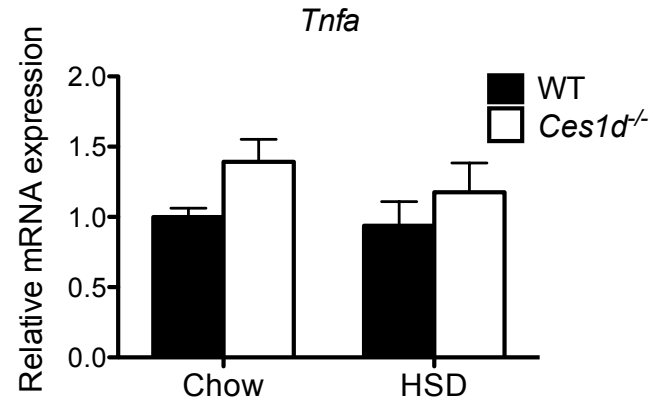**C**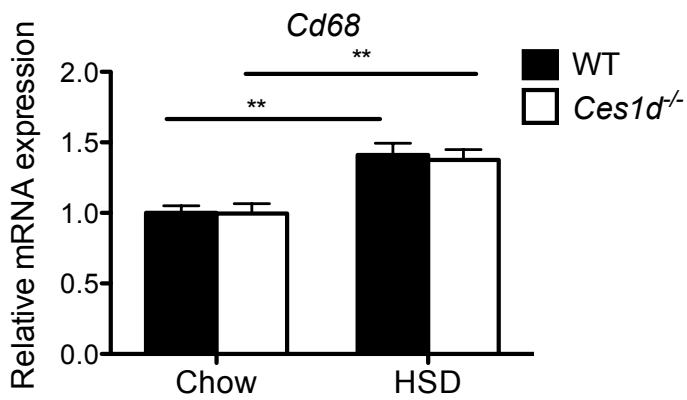

**Supplemental Figure S4.** Hepatic mRNA expression of inflammatory markers in WT and *Ces1d*<sup>-/-</sup> mice fed either chow or HSD. N=6. values are mean  $\pm$  SEM. \*P<0.05, \*\*P<0.01.

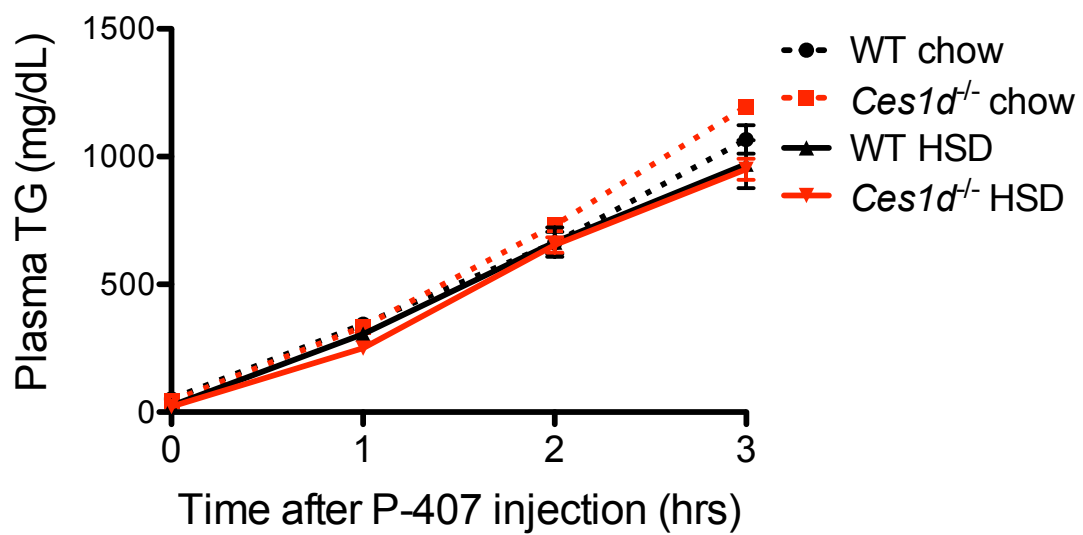

**Supplemental Figure S5.** VLDL-TG secretion rates of WT and *Ces1d*<sup>-/-</sup> mice fed chow diet or HSD. N=4-6, values are mean ± SEM.



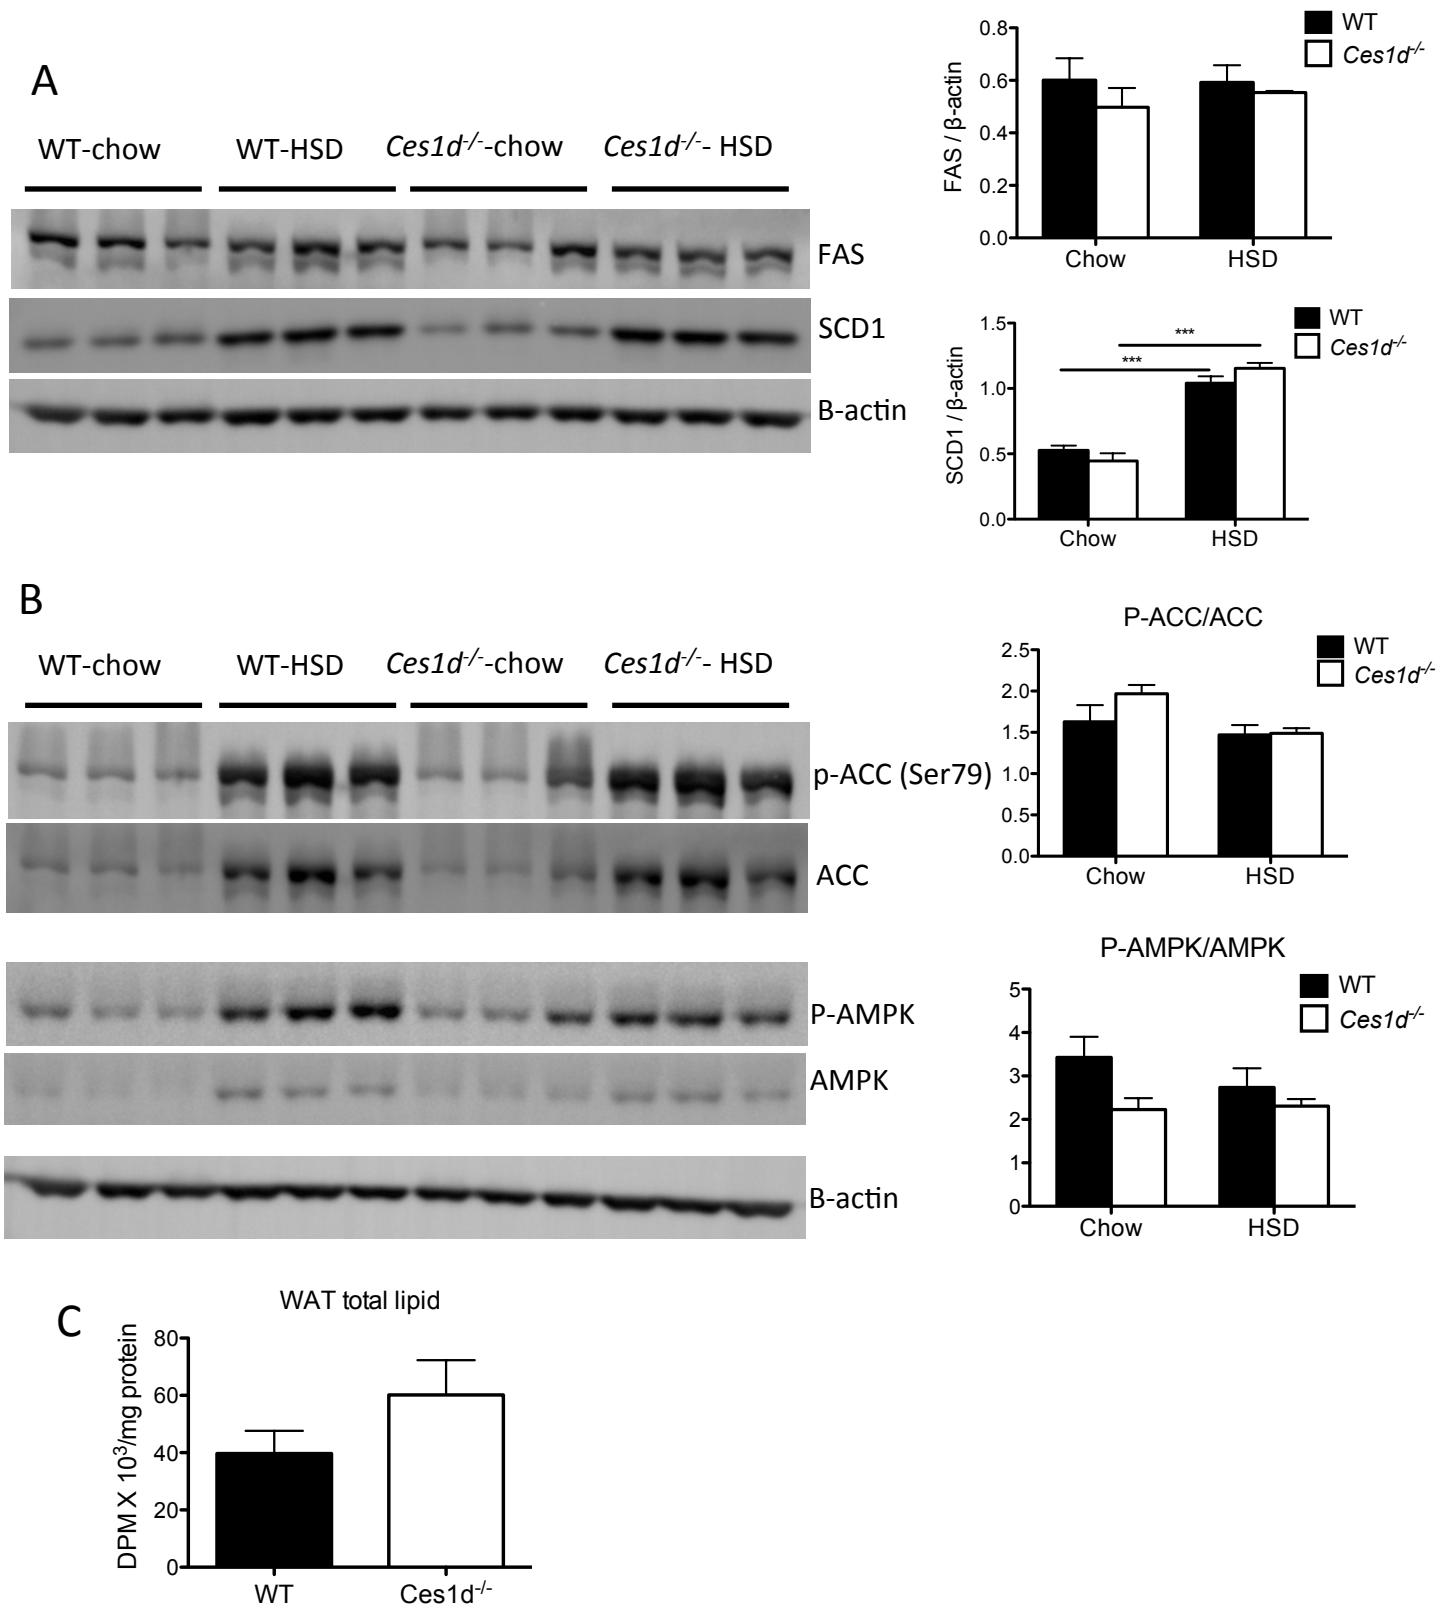

**Supplemental Figure S6.** Effects of HSD and *Ces1d* deficiency on lipogenic enzymes and AMPK in white adipose tissue (WAT). Abundance of (A) FAS, SCD-1, (B) p-ACC/ACC, and p-AMPK/AMPK in chow or HSD fed WT and *Ces1d*<sup>-/-</sup> mice was assessed by immunoblotting. Values of relative band intensities were shown as

mean  $\pm$  SEM. (C) Lipogenic rate in the WAT of HSD fed WT and *Ces1d*<sup>-/-</sup> mice was evaluated by the incorporation of <sup>14</sup>C-acetate precursor into total lipids during refed state. N=6. values are mean  $\pm$  SEM.

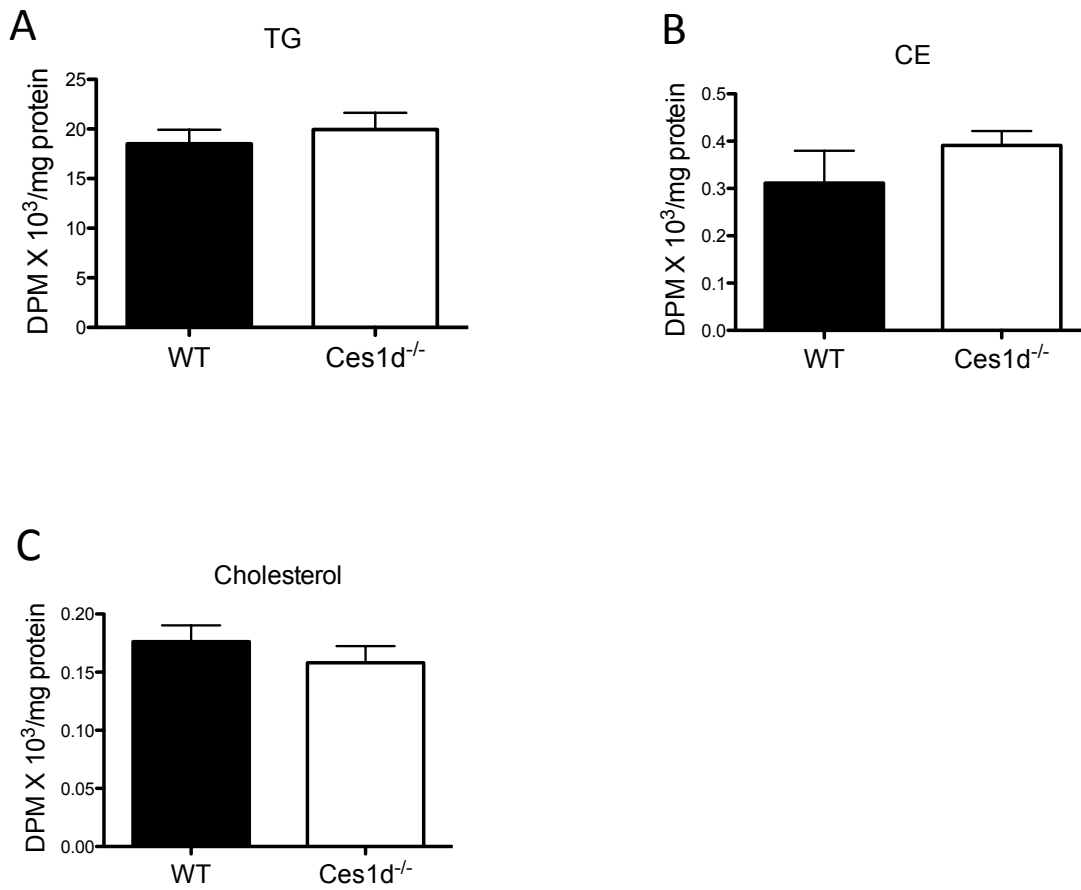

**Supplemental Figure S7.** Lipogenic rate in the livers of HSD fed WT and *Ces1d*<sup>-/-</sup> mice was evaluated by the incorporation of <sup>14</sup>C-acetate precursor into liver (A) TG, (B) CE, and (C) cholesterol during refed state.

N=6. values are mean ± SEM.

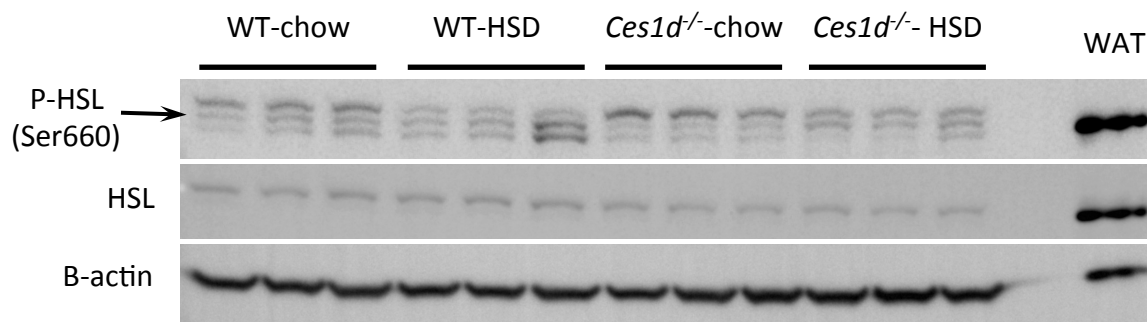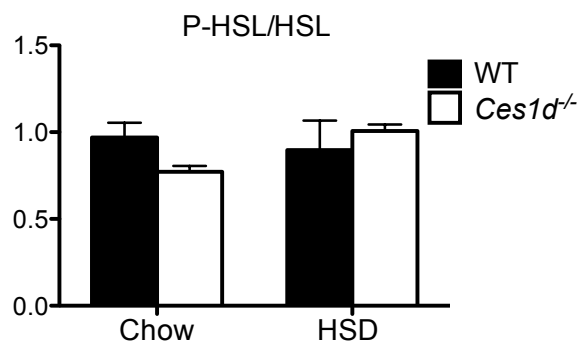

**Supplemental Figure S8.** Protein abundance of liver p-HSL/HSL in chow or HSD fed WT and *Ces1d*<sup>-/-</sup> mice was assessed by immunoblotting. Values of relative band intensities were shown as mean  $\pm$  SEM.
